# Supplementary material for: A comparison of drinking behavior using a harmonized methodology (Liq.In7) in six countries
Source: Eur J Nutr. 2018 Jun 12;57(Suppl 3):101–12. doi: 10.1007/s00394-018-1744-8 (PMC6008358; doi:10.1007/s00394-018-1744-8)
Supplement: Supplementary file 1 — Supplementary material 1 (DOCX 239 KB) [file 394_2018_1744_MOESM1_ESM.docx]

**A cross-cultural comparison of drinking behavior using a harmonized methodology (*Liq.In7*) in 6 countries**

*Morin C,1 Gandy J,2,3 Moreno LA, 4,5 Kavouras SA,6,7 Martinez H,8,9 Salas-Salvadó J 5,10 Guelinckx I,1**

1 Department of Hydration & Health, Danone Nutricia Research, Palaiseau, France

2 British Dietetic Association, Birmingham, UK

3 School of Life Medical services, University of Hertfordshire, Hatfield, UK

4 GENUD (Growth, Exercise, NUtrition and Development) Research Group, Faculty of Health Sciences, Universidad de Zaragoza, Instituto Agroalimentario de Aragón (IA2), Instituto Investigación Sanitaria Aragón (IIS Aragón)

5 CIBERobn (Centro de Investigación Biomédica en Red Fisiopatología de la Obesidad y Nutrición), Institute of Health Carlos III, Madrid, Spain

6 Hydration Science Lab, University of Arkansas, Fayetteville, AR, USA

7 Division of Endocrinology, University of Arkansas for Medical Sciences, Little Rock, AR, USA

8 Hospital Infantil de México Federico Gómez, México City, México

9 Nutrition International, Ottawa, Canada

10 Human Nutrition Unit, Hospital Universitari de Sant Joan de Reus, Faculty of Medicine and Health Sciences, Institut d’Investigació Sanitària Pere Virgili, Biochemistry and Biotechnology Department, Universitat Rovira i Virgili Reus, Spain

*** Corresponding author:** Isabelle GUELINCKX, Hydration and Health department, Danone Nutricia Research, Route Départemental 128, 91767 Palaiseau, France; isabelle.guelinckx@danone.com

**ONLINE RESOURCE**

**Table S1** General characteristics of the survey population, by country and age group

| Age group | Country | Gender |  | Age (years) | BMI (kg/m²) |
| --- | --- | --- | --- | --- | --- |
|  |  | **Male** | **Female** |  |  |
| **4-9 years** |  |  |  |  |  |
|  | Mexico (n=293) | 140 (48) | 153 (52) | 6.5 ± 1.7 | 25.7 ± 15.1 |
|  | Brazil (n=146) | 68 (47) | 78 (53) | 6.6 ± 1.8 | 18.7 ± 4.3 |
|  | Argentina (n=173) | 114 (66) | 59 (34) | 6.4 ± 1.7 | 19.3 ± 6.2 |
|  | Uruguay (n=121) | 57 (47) | 64 (53) | 7.7 ± 0.9 | 18.9 ± 4.5 |
|  | China (n=279) | 143 (51) | 136 (49) | 6.3 ± 1.6 | 19.4 ± 6.3 |
|  | Indonesia (n=388) | 244 (63) | 144 (37) | 6.4 ± 1.7 | 21.7 ± 14.4 |
| **10-17 years** |  |  |  |  |  |
|  | Mexico (n=376) | 212 (56) | 164 (44) | 13.5 ± 2.4 | 22.8 ± 5.8 |
|  | Brazil (n=194) | 62 (32) | 132 (68) | 13.6 ± 2.3 | 21.4 ± 5.2 |
|  | Argentina (n=219) | 130 (59) | 89 (41) | 13.5 ± 2.2 | 21.3 ± 3.8 |
|  | Uruguay (n=144) | 74 (51) | 70 (49) | 12.3 ± 2.3 | 20.7 ± 8.5 |
|  | China (n=370) | 187 (51) | 183 (49) | 13.7 ± 2.4 | 21.2 ± 5.9 |
|  | Indonesia (n=478) | 278 (58) | 200 (42) | 13.4 ± 2.3 | 22.3 ± 16.2 |
| **≥ 18 years** |  |  |  |  |  |
|  | Mexico (n=1677) | 746 (44) | 931 (56) | 37.6 ± 13.1 | 26.7 ± 4.9 |
|  | Brazil (n=477) | 224 (47) | 253 (53) | 39.5 ± 14.0 | 27.0 ± 6.8 |
|  | Argentina (n=1089) | 464 (43) | 625 (57) | 38.5 ± 13.3 | 26.0 ± 5.6 |
|  | Uruguay (n=554) | 278 (50) | 276 (50) | 37.7 ± 13.3 | 25.7 ± 10.3 |
|  | China (n=1584) | 790 (50) | 794 (50) | 33.7 ± 10.2 | 23.2 ± 5.6 |
|  | Indonesia (n=2778) | 1256 (45) | 1522 (55) | 35.5 ± 12.1 | 23.2 ± 5.5 |

*BMI*body mass index

Age and BMI presented as mean ± standard deviation and gender as number and proportion(%)

**Table S2a** Mean (SEM) intake of different fluid types (mL/day) according to meal occasions among children (4-9 years), by country

| Country | Occasions | Water | | Milk & derivatives | | Hot beverages | | SSB | | 100% FJ | | A/NSB | | Alcoholic beverages | | Other beverages | | TFI | |
| --- | --- | --- | --- | --- | --- | --- | --- | --- | --- | --- | --- | --- | --- | --- | --- | --- | --- | --- | --- |
| **Mexico (n=293)** | Daily total | 384 | ±26 | 315 | ±16 | 37 | ±6 | 458 | ±23 | 19 | ±3 | 11 | ±3 | 0 | ±0 | 7 | ±3 | 1232 | ±39 |
| Meals | 115 | ±11 | 177 | ±13 | 19 | ±4 | 291 | ±18 | 11 | ±2 | 9 | ±3 | 0 | ±0 | 3 | ±2 | 625 | ±25 |
| Outside of meals | 68 | ±12 | 51 | ±6 | 6 | ±2 | 69 | ±7 | 3 | ±1 | 1 | ±0 | 0 | ±0 | 0 | ±0 | 198 | ±17 |
| Without food | 202 | ±19 | 87 | ±9 | 12 | ±3 | 98 | ±11 | 6 | ±2 | 1 | ±1 | 0 | ±0 | 3 | ±1 | 409 | ±27 |
| **Brazil(n=146)** | Daily total | 455 | ±26 | 336 | ±21 | 44 | ±6 | 434 | ±25 | 120 | ±22 | 9 | ±3 | 0 | ±0 | 15 | ±4 | 1414 | ±56 |
| Meals | 21 | ±4 | 63 | ±8 | 16 | ±4 | 232 | ±17 | 49 | ±6 | 6 | ±2 | 0 | ±0 | 5 | ±2 | 393 | ±24 |
| Outside of meals | 19 | ±7 | 71 | ±9 | 12 | ±3 | 79 | ±9 | 40 | ±19 | 2 | ±1 | 0 | ±0 | 3 | ±1 | 227 | ±27 |
| Without food | 386 | ±24 | 183 | ±16 | 13 | ±2 | 104 | ±12 | 27 | ±5 | 2 | ±1 | 0 | ±0 | 6 | ±2 | 722 | ±33 |
|  | Unspecified | 28 | ±4 | 19 | ±3 | 3 | ±1 | 18 | ±4 | 4 | ±1 | 0 | ±0 | 0 | ±0 | 0 | ±0 | 72 | ±9 |
| **Argentina (n=173)** | Daily total | 435 | ±41 | 364 | ±20 | 141 | ±14 | 711 | ±46 | 19 | ±5 | 133 | ±20 | 1 | ±0 | 2 | ±1 | 1807 | ±61 |
| Meals | 174 | ±23 | 106 | ±15 | 34 | ±6 | 462 | ±31 | 9 | ±4 | 94 | ±16 | 1 | ±0 | 1 | ±1 | 881 | ±37 |
| Outside of meals | 46 | ±8 | 175 | ±15 | 89 | ±12 | 122 | ±13 | 5 | ±2 | 25 | ±5 | 0 | ±0 | 0 | ±0 | 463 | ±25 |
| Without food | 215 | ±24 | 83 | ±11 | 17 | ±4 | 127 | ±16 | 6 | ±2 | 14 | ±3 | 0 | ±0 | 0 | ±0 | 463 | ±31 |
| **Uruguay (n=121)** | Daily total | 535 | ±34 | 418 | ±28 | 1 | ±1 | 687 | ±44 | 4 | ±4 | 8 | ±5 | 0 | ±0 | 40 | ±13 | 1693 | ±52 |
| Meals | 242 | ±24 | 8 | ±3 | 0 | ±0 | 449 | ±35 | 0 | ±0 | 1 | ±1 | 0 | ±0 | 0 | ±0 | 701 | ±32 |
| Outside of meals | 66 | ±16 | 386 | ±29 | 0 | ±0 | 113 | ±20 | 4 | ±4 | 6 | ±4 | 0 | ±0 | 33 | ±11 | 608 | ±34 |
| Without food | 227 | ±25 | 24 | ±6 | 1 | ±1 | 125 | ±24 | 0 | ±0 | 1 | ±1 | 0 | ±0 | 6 | ±3 | 384 | ±35 |
| **China (n=279)** | Daily total | 494 | ±21 | 269 | ±12 | 11 | ±2 | 128 | ±12 | 61 | ±7 | 1 | ±0 | 0 | ±0 | 2 | ±1 | 966 | 30 |
| Meals | 89 | ±8 | 106 | ±6 | 3 | ±1 | 45 | ±5 | 22 | ±3 | 0 | ±0 | 0 | ±0 | 1 | ±1 | 266 | ±13 |
| Outside of meals | 32 | ±5 | 22 | ±3 | 2 | ±1 | 18 | ±4 | 9 | ±2 | 1 | ±0 | 0 | ±0 | 0 | ±0 | 83 | ±11 |
| Without food | 373 | ±17 | 141 | ±9 | 6 | ±2 | 65 | ±6 | 31 | ±4 | 0 | ±0 | 0 | ±0 | 1 | ±0 | 617 | ±22 |
| **Indonesia (n=388)** | Daily total | 1663 | ±42 | 254 | ±16 | 68 | ±9 | 167 | ±12 | 6 | ±2 | 2 | ±1 | 0 | ±0 | 5 | ±2 | 2165 | ±45 |
|  | Meals | 439 | ±17 | 38 | ±5 | 18 | ±3 | 24 | ±3 | 1 | ±0 | 0 | ±0 | 0 | ±0 | 0 | ±0 | 520 | ±18 |
|  | Outside of meals | 263 | ±20 | 49 | ±5 | 21 | ±4 | 39 | ±5 | 1 | ±0 | 0 | ±0 | 0 | ±0 | 1 | ±0 | 373 | ±23 |
|  | Without food | 961 | ±36 | 168 | ±14 | 28 | ±4 | 105 | ±9 | 5 | ±1 | 2 | ±1 | 0 | ±0 | 4 | ±2 | 1272 | ±40 |

*SEM* Standard error of the mean, *SSB* sugar sweetened beverages, *FJ* fruit juices, *A/NSB* artificial/non-nutritive sweeteners beverages, *TFI* total fluid intake

**Table S2b** Mean (SEM) intake of different fluid types (mL/day) according to meal occasions among adolescents (10-17 years), by country

| **Country** | Occasions | Water | | Milk & derivatives | | Hot beverages | | SSB | | 100% FJ | | A/NSB | | Alcoholic beverages | | Other beverages | | TFI | |
| --- | --- | --- | --- | --- | --- | --- | --- | --- | --- | --- | --- | --- | --- | --- | --- | --- | --- | --- | --- |
| **Mexico (n=376)** | Daily total | 639 | ±35 | 211 | ±12 | 102 | ±10 | 667 | ±29 | 25 | ±4 | 15 | ±3 | 4 | ±2 | 15 | ±4 | 1679 | ±47 |
| Meals | 197 | ±17 | 107 | ±9 | 56 | ±7 | 422 | ±23 | 14 | ±3 | 8 | ±2 | 2 | ±1 | 4 | ±2 | 809 | ±31 |
| Outside of meals | 98 | ±12 | 48 | ±6 | 19 | ±4 | 113 | ±13 | 4 | ±2 | 2 | ±1 | 0 | ±0 | 5 | ±2 | 289 | ±19 |
| Without food | 343 | ±26 | 56 | ±6 | 27 | ±4 | 133 | ±11 | 8 | ±2 | 6 | ±2 | 2 | ±1 | 5 | ±2 | 581 | ±32 |
| **Brazil (n=194)** | Daily total | 630 | ±41 | 207 | ±17 | 102 | ±11 | 600 | ±32 | 121 | ±17 | 28 | ±5 | 21 | ±7 | 5 | ±2 | 1713 | ±69 |
| Meals | 48 | ±7 | 55 | ±6 | 37 | ±6 | 288 | ±20 | 47 | ±7 | 12 | ±3 | 0 | ±0 | 0 | ±0 | 487 | ±29 |
| Outside of meals | 35 | ±7 | 51 | ±8 | 25 | ±4 | 110 | ±10 | 23 | ±4 | 5 | ±1 | 3 | ±2 | 2 | ±1 | 253 | ±22 |
| Without food | 508 | ±31 | 88 | ±9 | 37 | ±8 | 181 | ±16 | 44 | ±9 | 10 | ±2 | 17 | ±6 | 2 | ±1 | 888 | ±41 |
|  | Unspecified | 39 | ±10 | 13 | ±4 | 4 | ±1 | 21 | ±5 | 7 | ±2 | 1 | ±0 | 0 | ±0 | 0 | ±0 | 85 | ±16 |
| **Argentina (n=219)** | Daily total | 454 | ±31 | 222 | ±17 | 239 | ±19 | 818 | ±42 | 17 | ±5 | 128 | ±19 | 17 | ±5 | 2 | ±1 | 1897 | ±51 |
| Meals | 202 | ±21 | 47 | ±7 | 42 | ±6 | 561 | ±32 | 8 | ±4 | 97 | ±15 | 6 | ±3 | 0 | ±0 | 965 | ±33 |
| Outside of meals | 57 | ±9 | 130 | ±15 | 137 | ±13 | 111 | ±11 | 3 | ±1 | 13 | ±4 | 2 | ±2 | 0 | ±0 | 454 | ±26 |
| Without food | 195 | ±17 | 45 | ±7 | 60 | ±10 | 145 | ±16 | 6 | ±2 | 18 | ±4 | 8 | ±4 | 2 | ±1 | 479 | ±29 |
| **Uruguay (n=144)** | Daily total | 561 | ±51 | 318 | ±26 | 164 | ±31 | 521 | ±41 | 21 | ±9 | 57 | ±14 | 2 | ±1 | 25 | ±6 | 1668 | ±68 |
| Meals | 240 | ±33 | 18 | ±6 | 24 | ±9 | 323 | ±30 | 14 | ±7 | 32 | ±9 | 1 | ±1 | 11 | ±5 | 662 | ±39 |
| Outside of meals | 65 | ±12 | 259 | ±25 | 63 | ±15 | 100 | ±19 | 7 | ±5 | 6 | ±3 | 0 | ±0 | 13 | ±4 | 514 | ±31 |
| Without food | 256 | ±37 | 41 | ±11 | 76 | ±20 | 98 | ±16 | 0 | ±0 | 19 | ±7 | 1 | ±1 | 1 | ±1 | 492 | ±48 |
| **China (n=370)** | Daily total | 632 | ±27 | 189 | ±8 | 37 | ±6 | 253 | ±13 | 45 | ±4 | 7 | ±1 | 13 | ±4 | 1 | ±1 | 1177 | ±31 |
|  | Meals | 124 | ±8 | 99 | ±5 | 10 | ±2 | 78 | ±6 | 19 | ±2 | 2 | ±1 | 7 | ±2 | 1 | ±1 | 341 | ±13 |
|  | Outside of meals | 35 | ±7 | 11 | ±2 | 3 | ±1 | 20 | ±3 | 5 | ±1 | 0 | ±0 | 3 | ±2 | 0 | ±0 | 77 | ±9 |
|  | Without food | 474 | ±22 | 80 | ±5 | 24 | ±5 | 155 | ±9 | 21 | ±2 | 4 | ±1 | 3 | ±1 | 0 | ±0 | 759 | ±26 |
| **Indonesia (n=478)** | Daily total | 1933 | ±43 | 136 | ±11 | 121 | ±9 | 282 | ±16 | 9 | ±2 | 3 | ±2 | 0 | ±0 | 4 | ±1 | 2488 | ±49 |
|  | Meals | 527 | ±19 | 23 | ±4 | 34 | ±4 | 51 | ±5 | 1 | ±1 | 0 | ±0 | 0 | ±0 | 1 | ±0 | 637 | ±21 |
|  | Outside of meals | 270 | ±18 | 40 | ±6 | 35 | ±4 | 77 | ±7 | 2 | ±1 | 1 | ±1 | 0 | ±0 | 1 | ±0 | 426 | ±23 |
|  | Without food | 1136 | ±36 | 73 | ±7 | 52 | ±5 | 155 | ±11 | 5 | ±2 | 2 | ±1 | 0 | ±0 | 3 | ±1 | 1425 | ±40 |

*SEM* Standard error of the mean, *SSB* sugar sweetened beverages, *FJ* fruit juices, *A/NSB* artificial/non-nutritive sweeteners beverages, *TFI* total fluid intake

**Table S2c** Mean (SEM) intake of different fluid types (mL/day) according to meal occasions among adults (≥18 years), by country

| Country | Occasions | Water | | Milk & derivatives | | Hot beverages | | SSB | | 100% FJ | | A/NSB | | Alcoholic beverages | | | Other beverages | | | TFI | | |
| --- | --- | --- | --- | --- | --- | --- | --- | --- | --- | --- | --- | --- | --- | --- | --- | --- | --- | --- | --- | --- | --- | --- |
| Mexico (n=1677) | Daily total | 673 | ±18 | 132 | ±5 | 210 | ±7 | 655 | ±13 | 35 | ±3 | 23 | ±2 | 22 | ±2 | 6 | | ±1 | 1754 | | ±24 |
| Meals | 192 | ±9 | 61 | ±3 | 111 | ±5 | 438 | ±10 | 19 | ±2 | 13 | ±2 | 6 | ±1 | 2 | | ±0 | 842 | | ±14 |
| Outside of meals | 63 | ±4 | 25 | ±2 | 42 | ±3 | 80 | ±4 | 4 | ±1 | 3 | ±1 | 7 | ±1 | 1 | | ±0 | 225 | | ±8 |
| Without food | 418 | ±14 | 46 | ±3 | 57 | ±4 | 137 | ±6 | 13 | ±2 | 7 | ±1 | 8 | ±1 | 3 | | ±0 | 688 | | ±17 |
| Brazil (n=477) | Daily total | 756 | ±28 | 92 | ±7 | 199 | ±10 | 490 | ±19 | 110 | ±7 | 23 | ±4 | 142 | ±12 | 10 | | ±2 | 1822 | | ±46 |
| Meals | 60 | ±7 | 25 | ±3 | 64 | ±5 | 258 | ±12 | 53 | ±5 | 11 | ±2 | 22 | ±4 | 1 | | ±0 | 493 | | ±18 |
| Outside of meals | 28 | ±4 | 17 | ±2 | 42 | ±3 | 74 | ±6 | 17 | ±2 | 6 | ±2 | 28 | ±4 | 0 | | ±0 | 211 | | ±12 |
| Without food | 632 | ±23 | 47 | ±4 | 87 | ±7 | 143 | ±9 | 38 | ±3 | 6 | ±1 | 88 | ±8 | 8 | | ±2 | 1049 | | ±33 |
|  | Unspecified | 36 | ±6 | 3 | ±1 | 6 | ±1 | 15 | ±2 | 2 | ±0 | 1 | ±0 | 4 | ±1 | 1 | | ±0 | 68 | | ±8 |
| Argentina (n=1089) | Daily total | 581 | ±20 | 60 | ±4 | 827 | ±17 | 488 | ±16 | 22 | ±3 | 160 | ±10 | 128 | ±8 | 6 | | ±1 | 2272 | | ±31 |
| Unspecified | 36 | ±6 | 3 | ±1 | 6 | ±1 | 15 | ±2 | 2 | ±0 | 1 | ±0 | 4 | ±1 | 1 | | ±0 | 68 | | ±8 |
| Meals | 244 | ±11 | 16 | ±2 | 143 | ±8 | 367 | ±12 | 8 | ±2 | 128 | ±8 | 79 | ±5 | 3 | | ±1 | 987 | | ±17 |
| Outside of meals | 36 | ±4 | 21 | ±2 | 378 | ±12 | 42 | ±3 | 5 | ±1 | 10 | ±2 | 15 | ±2 | 0 | | ±0 | 506 | | ±13 |
| Without food | 301 | ±13 | 24 | ±3 | 307 | ±13 | 79 | ±6 | 9 | ±2 | 22 | ±3 | 34 | ±4 | 3 | | ±1 | 779 | | ±21 |
| Uruguay (n=554) | Daily total | 493 | ±22 | 83 | ±6 | 873 | ±35 | 359 | ±17 | 26 | ±4 | 103 | ±10 | 48 | ±6 | 14 | | ±3 | 1999 | | ±43 |
| Meals | 208 | ±14 | 11 | ±2 | 78 | ±10 | 220 | ±12 | 7 | ±2 | 76 | ±8 | 30 | ±5 | 8 | | ±2 | 639 | | ±20 |
| Outside of meals | 43 | ±6 | 52 | ±5 | 418 | ±27 | 48 | ±6 | 9 | ±2 | 10 | ±3 | 8 | ±1 | 2 | | ±1 | 590 | | ±29 |
| Without food | 241 | ±15 | 20 | ±3 | 376 | ±24 | 91 | ±9 | 10 | ±2 | 17 | ±3 | 10 | ±2 | 4 | | ±2 | 769 | | ±30 |
| China (n=1584) | Daily total | 751 | ±16 | 132 | ±3 | 136 | ±7 | 261 | ±7 | 35 | ±2 | 7 | ±1 | 62 | ±4 | 2 | | ±0 | 1387 | | ±18 |
| Meals | 147 | ±6 | 73 | ±2 | 21 | ±1 | 87 | ±3 | 17 | ±1 | 3 | ±1 | 47 | ±3 | 1 | | ±0 | 395 | | ±8 |
| Outside of meals | 31 | ±3 | 6 | ±1 | 8 | ±1 | 18 | ±1 | 2 | ±0 | 0 | ±0 | 4 | ±1 | 0 | | ±0 | 70 | | ±4 |
| Without food | 573 | ±13 | 54 | ±2 | 107 | ±6 | 156 | ±5 | 16 | ±1 | 4 | ±1 | 11 | ±1 | 1 | | ±0 | 922 | | ±15 |
| **Indonesia (n=2778)** | Daily total | 2164 | ±20 | 52 | ±3 | 263 | ±6 | 227 | ±7 | 12 | ±1 | 2 | ±0 | 0 | ±0 | 2 | | ±0 | 2721 | | ±22 |
|  | Meals | 598 | ±9 | 8 | ±1 | 57 | ±3 | 49 | ±2 | 2 | ±0 | 0 | ±0 | 0 | ±0 | 0 | | ±0 | 715 | | ±10 |
|  | Outside of meals | 273 | ±8 | 13 | ±1 | 85 | ±3 | 58 | ±3 | 3 | ±0 | 1 | ±0 | 0 | ±0 | 0 | | ±0 | 433 | | ±10 |
|  | Without food | 1292 | ±16 | 31 | ±2 | 121 | ±4 | 120 | ±4 | 7 | ±1 | 1 | ±0 | 0 | ±0 | 1 | | ±0 | 1573 | | ±18 |

*SEM* Standard error of the mean, *SSB* sugar sweetened beverages, *FJ* fruit juices, *A/NSB* artificial/non-nutritive sweeteners beverages, *TFI* total fluid intake

**Table S3a** Median (P25-P75) intake of different fluid types (mL/day) according to drinking occasions among children (4-9 years), by country

| **Occasions** | **Water** | **Milk & derivatives** | **Hot beverages** | **SSB** | **100% FJ** | **A/NSB** | **Alcoholic beverages** | **Other beverages** | **TFI** |
| --- | --- | --- | --- | --- | --- | --- | --- | --- | --- |
| **Mexico (n=293)** |  |  |  |  |  |  |  |  |  |
| Daily total | 252 (90-505) | 265 (111-451) | 0 (0-28) | 391 (185-607) | 0 (0-0) | 0 (0-0) | 0 (0-0) | 0 (0-0) | 1061 (751-1490) |
| Meals | 43 (0-143) | 103 (0-268) | 0 (0-0) | 214 (72-387) | 0 (0-0) | 0 (0-0) | 0 (0-0) | 0 (0-0) | 550 (293-878) |
| Outside of meals | 0 (0-60) | 0 (0-57) | 0 (0-0) | 0 (0-86) | 0 (0-0) | 0 (0-0) | 0 (0-0) | 0 (0-0) | 86 (0-272) |
| Without food | 94 (0-271) | 9 (0-107) | 0 (0-0) | 36 (0-132) | 0 (0-0) | 0 (0-0) | 0 (0-0) | 0 (0-0) | 284 (93-533) |
| **Brazil a (n=146)** |  |  |  |  |  |  |  |  |  |
| Daily total | 369 (238-609) | 302 (152-468) | 0 (0-63) | 396 (197-603) | 55 (0-158) | 0 (0-0) | 0 (0-0) | 0 (0-0) | 1297 (957-1632) |
| Meals | 0 (0-27) | 27 (0-89) | 0 (0-0) | 211 (65-349) | 9 (0-72) | 0 (0-0) | 0 (0-0) | 0 (0-0) | 330 (170-551) |
| Outside of meals | 0 (0-2) | 29 (0-107) | 0 (0-0) | 34 (0-121) | 0 (0-29) | 0 (0-0) | 0 (0-0) | 0 (0-0) | 153 (52-299) |
| Without food | 317 (178-536) | 138 (36-268) | 0 (0-0) | 63 (7-141) | 0 (0-29) | 0 (0-0) | 0 (0-0) | 0 (0-0) | 619 (462-869) |
| **Argentina (n=173)** |  |  |  |  |  |  |  |  |  |
| Daily total | 271 (79-607) | 343 (154-517) | 54 (0-211) | 545 (254-1062) | 0 (0-0) | 0 (0-156) | 0 (0-0) | 0 (0-0) | 1633 (1185-2344) |
| Meals | 43 (0-214) | 0 (0-115) | 0 (0-0) | 380 (133-672) | 0 (0-0) | 0 (0-86) | 0 (0-0) | 0 (0-0) | 800 (493-1193) |
| Outside of meals | 0 (0-51) | 114 (0-293) | 0 (0-119) | 50 (0-187) | 0 (0-0) | 0 (0-0) | 0 (0-0) | 0 (0-0) | 429 (206-685) |
| Without food | 103 (0-286) | 0 (0-103) | 0 (0-0) | 51 (0-166) | 0 (0-0) | 0 (0-0) | 0 (0-0) | 0 (0-0) | 343 (190-658) |
| **Uruguay (n=121)** |  |  |  |  |  |  |  |  |  |
| Daily total | 500 (250-768) | 429 (232-500) | 0 (0-0) | 570 (275-1026) | 0 (0-0) | 0 (0-0) | 0 (0-0) | 0 (0-0) | 1639 (1311-1904) |
| Meals | 163 (0-456) | 0 (0-0) | 0 (0-0) | 350 (200-666) | 0 (0-0) | 0 (0-0) | 0 (0-0) | 0 (0-0) | 686 (517-846) |
| Outside of meals | 0 (0-54) | 357 (171-500) | 0 (0-0) | 0 (0-143) | 0 (0-0) | 0 (0-0) | 0 (0-0) | 0 (0-0) | 523 (377-730) |
| Without food | 150 (0-338) | 0 (0-0) | 0 (0-0) | 0 (0-150) | 0 (0-0) | 0 (0-0) | 0 (0-0) | 0 (0-0) | 316 (100-591) |
| **China (n=279)** |  |  |  |  |  |  |  |  |  |
| Daily total | 403 (245-658) | 227 (136-356) | 0 (0-0) | 71 (0-179) | 21 (0-81) | 0 (0-0) | 0 (0-0) | 0 (0-0) | 839 (611-1196) |
| Meals | 43 (0-107) | 84 (31-157) | 0 (0-0) | 9 (0-68) | 0 (0-28) | 0 (0-0) | 0 (0-0) | 0 (0-0) | 216 (133-341) |
| Outside of meals | 0 (0-34) | 0 (0-26) | 0 (0-0) | 0 (0-0) | 0 (0-0) | 0 (0-0) | 0 (0-0) | 0 (0-0) | 16 (0-71) |
| Without food | 291 (156-501) | 107 (36-200) | 0 (0-0) | 33 (0-99) | 0 (0-43) | 0 (0-0) | 0 (0-0) | 0 (0-0) | 541 (363-819) |
| **Indonesia (n=388)** |  |  |  |  |  |  |  |  |  |
| Daily total | 1449 (1037-2298) | 150 (0-377) | 0 (0-64) | 69 (0-240) | 0 (0-0) | 0 (0-0) | ND | 0 (0-0) | 2074 (1431-2880) |
| Meals | 429 (208-617) | 0 (0-26) | 0 (0-0) | 0 (0-0) | 0 (0-0) | 0 (0-0) | ND | 0 (0-0) | 498 (277-716) |
| Outside of meals | 129 (0-353) | 0 (0-41) | 0 (0-0) | 0 (0-34) | 0 (0-0) | 0 (0-0) | ND | 0 (0-0) | 255 (63-512) |
| Without food | 780 (363-1435) | 57 (0-240) | 0 (0-0) | 19 (0-143) | 0 (0-0) | 0 (0-0) | ND | 0 (0-0) | 1135 (625-1839) |

*SSB* sugared sweetened beverages, *FJ* fruit juices, *A/NSB* artificial/non-nutritive sweeteners beverages, *TFI* total fluid intake

Data presented as median (25, 75th percentiles)

**Table S3b** Median (P25-P75) intake of different fluid types (mL/day) according to drinking occasions among adolescents (10-17 years**)**, by country

| **Occasions** | **Water** | **Milk & derivatives** | **Hot beverages** | **SSB** | **100% FJ** | **A/NSB** | **Alcoholic beverages** | **Other beverages** | **TFI** |
| --- | --- | --- | --- | --- | --- | --- | --- | --- | --- |
| **Mexico (n=376)** |  |  |  |  |  |  |  |  |  |
| Daily total | 391 (180-963) | 154 (9-320) | 0 (0-131) | 524 (258-908) | 0 (0-0) | 0 (0-0) | 0 (0-0) | 0 (0-0) | 1462 (1011-2121) |
| Meals | 69 (0-245) | 21 (0-137) | 0 (0-43) | 323 (129-575) | 0 (0-0) | 0 (0-0) | 0 (0-0) | 0 (0-0) | 695 (391-1047) |
| Outside of meals | 0 (0-96) | 0 (0-43) | 0 (0-0) | 0 (0-125) | 0 (0-0) | 0 (0-0) | 0 (0-0) | 0 (0-0) | 159 (0-419) |
| Without food | 154 (0-443) | 0 (0-68) | 0 (0-0) | 43 (0-172) | 0 (0-0) | 0 (0-0) | 0 (0-0) | 0 (0-0) | 430 (141-771) |
| **Brazil a (n=194)** |  |  |  |  |  |  |  |  |  |
| Daily total | 505 (278-778) | 156 (36-265) | 31 (0-149) | 499 (262-811) | 42 (0-157) | 0 (0-36) | 0 (0-0) | 0 (0-0) | 1491 (1030-2231) |
| Meals | 0 (0-54) | 8 (0-79) | 0 (0-36) | 205 (71-440) | 0 (0-54) | 0 (0-0) | 0 (0-0) | 0 (0-0) | 403 (189-679) |
| Outside of meals | 0 (0-20) | 0 (0-57) | 0 (0-25) | 52 (0-163) | 0 (0-20) | 0 (0-0) | 0 (0-0) | 0 (0-0) | 157 (63-349) |
| Without food | 405 (221-650) | 41 (0-125) | 0 (0-36) | 108 (35-252) | 0 (0-37) | 0 (0-0) | 0 (0-0) | 0 (0-0) | 781 (423-1192) |
| **Argentina (n=219)** |  |  |  |  |  |  |  |  |  |
| Daily total | 346 (93-675) | 144 (0-361) | 179 (0-357) | 686 (388-1147) | 0 (0-0) | 0 (0-100) | 0 (0-0) | 0 (0-0) | 1780 (1362-2400) |
| Meals | 34 (0-300) | 0 (0-26) | 0 (0-36) | 480 (189-791) | 0 (0-0) | 0 (0-54) | 0 (0-0) | 0 (0-0) | 889 (592-1320) |
| Outside of meals | 0 (0-50) | 34 (0-187) | 56 (0-227) | 43 (0-164) | 0 (0-0) | 0 (0-0) | 0 (0-0) | 0 (0-0) | 393 (146-679) |
| Without food | 100 (0-310) | 0 (0-43) | 0 (0-45) | 63 (0-204) | 0 (0-0) | 0 (0-0) | 0 (0-0) | 0 (0-0) | 392 (191-673) |
| **Uruguay (n=144)** |  |  |  |  |  |  |  |  |  |
| Daily total | 434 (155-798) | 240 (63-498) | 0 (0-87) | 390 (194-749) | 0 (0-0) | 0 (0-0) | 0 (0-0) | 0 (0-0) | 1544 (1088-2115) |
| Meals | 79 (0-428) | 0 (0-0) | 0 (0-0) | 209 (73-489) | 0 (0-0) | 0 (0-0) | 0 (0-0) | 0 (0-0) | 650 (350-829) |
| Outside of meals | 0 (0-53) | 165 (0-393) | 0 (0-0) | 0 (0-137) | 0 (0-0) | 0 (0-0) | 0 (0-0) | 0 (0-0) | 454 (208-747) |
| Without food | 92 (0-367) | 0 (0-0) | 0 (0-0) | 0 (0-128) | 0 (0-0) | 0 (0-0) | 0 (0-0) | 0 (0-0) | 290 (109-734) |
| **China (n=370)** |  |  |  |  |  |  |  |  |  |
| Daily total | 518 (303-777) | 161 (68-278) | 0 (0-36) | 205 (64-363) | 0 (0-71) | 0 (0-0) | 0 (0-0) | 0 (0-0) | 1071 (775-1408) |
| Meals | 71 (12-175) | 75 (21-157) | 0 (0-0) | 38 (0-112) | 0 (0-15) | 0 (0-0) | 0 (0-0) | 0 (0-0) | 300 (194-428) |
| Outside of meals | 0 (0-22) | 0 (0-0) | 0 (0-0) | 0 (0-0) | 0 (0-0) | 0 (0-0) | 0 (0-0) | 0 (0-0) | 0 (0-79) |
| Without food | 377 (214-589) | 37 (0-126) | 0 (0-20) | 107 (16-229) | 0 (0-25) | 0 (0-0) | 0 (0-0) | 0 (0-0) | 656 (437-982) |
| **Indonesia (n=478)** |  |  |  |  |  |  |  |  |  |
| Daily total | 1856 (1222-2465) | 4 (0-214) | 31 (0-192) | 173 (0-412) | 0 (0-0) | 0 (0-0) | ND | 0 (0-0) | 2422 (1651-3138) |
| Meals | 480 (240-720) | 0 (0-0) | 0 (0-27) | 0 (0-43) | 0 (0-0) | 0 (0-0) | ND | 0 (0-0) | 596 (337-846) |
| Outside of meals | 154 (0-346) | 0 (0-0) | 0 (0-26) | 0 (0-88) | 0 (0-0) | 0 (0-0) | ND | 0 (0-0) | 274 (83-599) |
| Without food | 999 (514-1633) | 0 (0-78) | 0 (0-50) | 57 (0-217) | 0 (0-0) | 0 (0-0) | ND | 0 (0-0) | 1344 (736-2028) |

*SSB* sugared sweetened beverages, *FJ* fruit juices, *A/NSB* artificial/non-nutritive sweeteners beverages, *TFI* total fluid intake

Data presented as median (25, 75th percentiles)**Table S3c** Median (P25-P75) intake of different fluid types (mL/day) according to drinking occasions among adults (≥ 18 years), by country

| **Occasions** | **Water** | **Milk & derivatives** | **Hot beverages** | **SSB** | **100% FJ** | **A/NSB** | **Alcoholic beverages** | **Other beverages** | **TFI** |
| --- | --- | --- | --- | --- | --- | --- | --- | --- | --- |
| **Mexico (n=1677)** |  |  |  |  |  |  |  |  |  |
| Daily total | 450 (180-900) | 60 (0-186) | 121 (0-286) | 531 (300-895) | 0 (0-0) | 0 (0-0) | 0 (0-0) | 0 (0-0) | 1496 (1060-2150) |
| Meals | 57 (0-235) | 0 (0-69) | 18 (0-143) | 356 (137-605) | 0 (0-0) | 0 (0-0) | 0 (0-0) | 0 (0-0) | 739 (420-1142) |
| Outside of meals | 0 (0-43) | 0 (0-0) | 0 (0-18) | 0 (0-86) | 0 (0-0) | 0 (0-0) | 0 (0-0) | 0 (0-0) | 89 (0-320) |
| Without food | 214 (21-593) | 0 (0-43) | 0 (0-46) | 43 (0-186) | 0 (0-0) | 0 (0-0) | 0 (0-0) | 0 (0-0) | 480 (193-970) |
| **Brazil (n=477)** |  |  |  |  |  |  |  |  |  |
| Daily total | 599 (349-1004) | 34 (0-117) | 150 (51-263) | 409 (195-669) | 50 (0-165) | 0 (0-0) | 0 (0-202) | 0 (0-0) | 1568 (1098-2333) |
| Meals | 0 (0-64) | 0 (0-18) | 14 (0-86) | 178 (64-386) | 0 (0-70) | 0 (0-0) | 0 (0-0) | 0 (0-0) | 411 (213-689) |
| Outside of meals | 0 (0-21) | 0 (0-0) | 0 (0-54) | 18 (0-91) | 0 (0-0) | 0 (0-0) | 0 (0-0) | 0 (0-0) | 130 (40-291) |
| Without food | 489 (271-838) | 0 (0-54) | 36 (0-121) | 80 (0-197) | 0 (0-43) | 0 (0-0) | 0 (0-109) | 0 (0-0) | 873 (574-1303) |
| **Argentina (n=1089)** |  |  |  |  |  |  |  |  |  |
| Daily total | 386 (96-855) | 0 (0-46) | 732 (431-1136) | 338 (82-754) | 0 (0-0) | 0 (0-154) | 0 (0-150) | 0 (0-0) | 2133 (1524-2865) |
| Meals | 64 (0-377) | 0 (0-0) | 0 (0-214) | 236 (39-570) | 0 (0-0) | 0 (0-125) | 0 (0-100) | 0 (0-0) | 896 (558-1330) |
| Outside of meals | 0 (0-18) | 0 (0-0) | 286 (64-557) | 0 (0-25) | 0 (0-0) | 0 (0-0) | 0 (0-0) | 0 (0-0) | 437 (157-745) |
| Without food | 150 (0-417) | 0 (0-0) | 159 (0-439) | 0 (0-80) | 0 (0-0) | 0 (0-0) | 0 (0-0) | 0 (0-0) | 607 (282-1081) |
| **Uruguay (n=554)** |  |  |  |  |  |  |  |  |  |
| Daily total | 325 (129-721) | 0 (0-125) | 699 (184-1356) | 215 (30-559) | 0 (0-0) | 0 (0-110) | 0 (0-0) | 0 (0-0) | 1873 (1194-2593) |
| Meals | 34 (0-294) | 0 (0-0) | 0 (0-15) | 104 (0-343) | 0 (0-0) | 0 (0-50) | 0 (0-0) | 0 (0-0) | 506 (286-877) |
| Outside of meals | 0 (0-0) | 0 (0-12) | 103 (0-615) | 0 (0-14) | 0 (0-0) | 0 (0-0) | 0 (0-0) | 0 (0-0) | 356 (70-885) |
| Without food | 103 (0-335) | 0 (0-0) | 86 (0-600) | 0 (0-81) | 0 (0-0) | 0 (0-0) | 0 (0-0) | 0 (0-0) | 563 (236-1131) |
| **China (n=1584)** |  |  |  |  |  |  |  |  |  |
| Daily total | 597 (349-961) | 107 (32-200) | 36 (0-129) | 193 (68-385) | 0 (0-50) | 0 (0-0) | 0 (0-43) | 0 (0-0) | 1214 (889-1684) |
| Meals | 77 (6-192) | 50 (0-114) | 0 (0-0) | 43 (0-136) | 0 (0-0) | 0 (0-0) | 0 (0-16) | 0 (0-0) | 325 (179-521) |
| Outside of meals | 0 (0-0) | 0 (0-0) | 0 (0-0) | 0 (0-0) | 0 (0-0) | 0 (0-0) | 0 (0-0) | 0 (0-0) | 0 (0-71) |
| Without food | 449 (249-750) | 26 (0-71) | 7 (0-86) | 100 (11-225) | 0 (0-0) | 0 (0-0) | 0 (0-0) | 0 (0-0) | 800 (518-1188) |
| **Indonesia (n=2778)** |  |  |  |  |  |  |  |  |  |
| Daily total | 2006 (1371-2824) | 0 (0-27) | 180 (0-391) | 85 (0-309) | 0 (0-0) | 0 (0-0) | ND | 0 (0-0) | 2599 (1827-3465) |
| Meals | 514 (257-823) | 0 (0-0) | 0 (0-54) | 0 (0-34) | 0 (0-0) | 0 (0-0) | ND | 0 (0-0) | 653 (400-950) |
| Outside of meals | 129 (0-380) | 0 (0-0) | 0 (0-106) | 0 (0-51) | 0 (0-0) | 0 (0-0) | ND | 0 (0-0) | 300 (65-607) |
| Without food | 1138 (636-1809) | 0 (0-0) | 34 (0-171) | 0 (0-153) | 0 (0-0) | 0 (0-0) | ND | 0 (0-0) | 1441 (858-2160) |

*SSB* sugared sweetened beverages, *FJ* fruit juices, *A/NSB* artificial/non-nutritive sweeteners beverages, *TFI* total fluid intake

Data presented as median (25, 75th percentiles)

**Table S4** Median (P25-P75) fluid intake (mL/day) by location, by country and age group

| **Country** | **At home** | **At school/univ/work** | **Other locations** |
| --- | --- | --- | --- |
| **4-9 years** | | | |
| Mexico (n=293) | 931 (674-1283) | 0 (0-136) | 0 (0-34) |
| Brazil (n=146) | 1050 (763-1337) | 83 (0-199) | 72 (0-183) |
| Argentina (n=173) | 1404 (931-1935) | 169 (34-346) | 0 (0-188) |
| Uruguay (n=121) | 1400 (1152-1679) | 146 (104-284) | 0 (0-0) |
| China (n=279) | 451 (308-648) | 207 (103-364) | 110 (30-236) |
| Indonesia (n=388) | 1835 (1281-2687) | 0 (0-217) | 0 (0-0) |
| **10-17 years** | | | |
| Mexico (n=376) | 1139 (809-1670) | 23 (0-274) | 0 (0-155) |
| Brazil (n=194) | 1147 (779-1758) | 53 (0-180) | 101 (0-259) |
| Argentina (n=219) | 1497 (1025-1975) | 136 (0-357) | 21 (0-179) |
| Uruguay (n=144) | 1292 (885-1735) | 120 (0-235) | 0 (0-0) |
| China (n=370) | 403 (207-641) | 418 (241-631) | 143 (36-292) |
| Indonesia (n=478) | 1978 (1405-2678) | 109 (0-456) | 0 (0-34) |
| **≥ 18 years** | | | |
| Mexico (n=1677) | 1227 (832-1784) | 0 (0-171) | 0 (0-163) |
| Brazil (n=477) | 1168 (821-1735) | 0 (0-233) | 128 (12-328) |
| Argentina (n=1089) | 1593 (1079-2135) | 158 (0-579) | 36 (0-286) |
| Uruguay (n=554) | 1472 (884-2078) | 22 (0-516) | 0 (0-100) |
| China (n=1584) | 500 (279-767) | 361 (179-633) | 244 (89-492) |
| Indonesia (n=2778) | 2191 (1513-3018) | 0 (0-405) | 0 (0-43) |

*P25* 25th percentiles, *P75* 75th percentiles

**Table S5a** Mean (SEM) intake of different fluid types (mL/day) according to drinking locations among children (4-9 years), by country

| Country | Occasions | Water | | Milk & derivatives | | Hot beverages | | SSB | | 100% FJ | | A/NSB | | Alcoholic beverages | | Other beverages | | TFI | |
| --- | --- | --- | --- | --- | --- | --- | --- | --- | --- | --- | --- | --- | --- | --- | --- | --- | --- | --- | --- |
| **Mexico (n=293)** | Daily total | 384 | ±26 | 315 | ±16 | 37 | ±6 | 458 | ±23 | 19 | ±3 | 11 | ±3 | 0 | ±0 | 7 | ±3 | 1232 | ±39 |
| Home | 314 | ±22 | 306 | ±16 | 36 | ±6 | 392 | ±21 | 18 | ±3 | 10 | ±3 | 0 | ±0 | 6 | ±3 | 1083 | ±35 |
| School/univ/work | 58 | ±10 | 6 | ±2 | 1 | ±0 | 38 | ±5 | 0 | ±0 | 1 | ±1 | 0 | ±0 | 1 | ±1 | 105 | ±12 |
| Other locations | 13 | ±3 | 2 | ±1 | 1 | ±0 | 28 | ±5 | 0 | ±0 | 0 | ±0 | 0 | ±0 | 0 | ±0 | 44 | ±6 |
| **Brazil(n=146)** | Daily total | 455 | ±26 | 336 | ±21 | 44 | ±6 | 434 | ±25 | 120 | ±22 | 9 | ±3 | 0 | ±0 | 15 | ±4 | 1414 | ±56 |
| Home | 361 | ±21 | 295 | ±20 | 39 | ±6 | 325 | ±20 | 92 | ±19 | 8 | ±3 | 0 | ±0 | 10 | ±3 | 1131 | ±47 |
| School/univ/work | 56 | ±8 | 21 | ±4 | 2 | ±2 | 35 | ±6 | 16 | ±4 | 0 | ±0 | 0 | ±0 | 3 | ±2 | 133 | ±15 |
| Other locations | 37 | ±9 | 19 | ±4 | 2 | ±1 | 68 | ±9 | 11 | ±3 | 1 | ±0 | 0 | ±0 | 1 | ±1 | 140 | ±20 |
|  | Unspecified | 2 | ±1 | 0 | ±0 | 0 | ±0 | 6 | ±2 | 1 | ±0 | 0 | ±0 | 0 | ±0 | 1 | ±0 | 10 | ±2 |
| **Argentina (n=173)** | Daily total | 435 | ±41 | 364 | ±20 | 141 | ±14 | 711 | ±46 | 19 | ±5 | 133 | ±20 | 1 | ±0 | 2 | ±1 | 1807 | ±61 |
| Home | 338 | ±33 | 333 | ±19 | 111 | ±12 | 552 | ±38 | 16 | ±4 | 107 | ±17 | 1 | ±0 | 2 | ±1 | 1460 | ±50 |
| School/univ/work | 82 | ±13 | 17 | ±4 | 26 | ±5 | 85 | ±12 | 2 | ±1 | 16 | ±4 | 0 | ±0 | 0 | ±0 | 227 | ±19 |
| Other locations | 15 | ±5 | 14 | ±3 | 4 | ±1 | 75 | ±11 | 1 | ±1 | 10 | ±3 | 0 | ±0 | 0 | ±0 | 119 | ±15 |
| **Uruguay (n=121)** | Daily total | 535 | ±34 | 418 | ±28 | 1 | ±1 | 687 | ±44 | 4 | ±4 | 8 | ±5 | 0 | ±0 | 40 | ±13 | 1693 | ±52 |
| Home | 458 | ±32 | 384 | ±24 | 0 | ±0 | 587 | ±40 | 4 | ±4 | 6 | ±5 | 0 | ±0 | 21 | ±8 | 1461 | ±49 |
| School/univ/work | 72 | ±13 | 34 | ±9 | 1 | ±1 | 99 | ±21 | 0 | ±0 | 2 | ±1 | 0 | ±0 | 19 | ±8 | 226 | ±25 |
| Other locations | 5 | ±3 | 0 | ±0 | 0 | ±0 | 1 | ±1 | 0 | ±0 | 0 | ±0 | 0 | ±0 | 0 | ±0 | 6 | ±3 |
| **China (n=279)** | Daily total | 494 | ±21 | 269 | ±12 | 11 | ±2 | 128 | ±12 | 61 | ±7 | 1 | ±0 | 0 | ±0 | 2 | ±1 | 966 | 30 |
| Home | 260 | ±15 | 198 | ±11 | 2 | ±1 | 37 | ±4 | 25 | ±3 | 0 | ±0 | 0 | ±0 | 1 | ±1 | 524 | ±19 |
| School/univ/work | 174 | ±11 | 33 | ±3 | 3 | ±1 | 31 | ±4 | 17 | ±3 | 0 | ±0 | 0 | ±0 | 0 | ±0 | 260 | ±14 |
| Other locations | 59 | ±6 | 37 | ±3 | 6 | ±1 | 60 | ±8 | 19 | ±3 | 1 | ±0 | 0 | ±0 | 0 | ±0 | 182 | ±15 |
| **Indonesia (n=388)** | Daily total | 1663 | ±42 | 254 | ±16 | 68 | ±9 | 167 | ±12 | 6 | ±2 | 2 | ±1 | 0 | ±0 | 5 | ±2 | 2165 | ±45 |
|  | Home | 1553 | ±41 | 237 | ±16 | 62 | ±8 | 115 | ±9 | 6 | ±2 | 1 | ±1 | 0 | ±0 | 3 | ±1 | 1977 | ±44 |
|  | School/univ/work | 101 | ±11 | 15 | ±3 | 5 | ±2 | 38 | ±6 | 0 | ±0 | 0 | ±0 | 0 | ±0 | 0 | ±0 | 159 | ±14 |
|  | Other locations | 9 | ±2 | 2 | ±1 | 0 | ±0 | 15 | ±2 | 0 | ±0 | 1 | ±0 | 0 | ±0 | 2 | ±2 | 29 | ±4 |

*SEM* Standard error of the mean, *SSB* sugar sweetened beverages, *FJ* fruit juices, *A/NSB* artificial/non-nutritive sweeteners beverages, *TFI* total fluid intake

**Table S5b** Mean (SEM) intake of different fluid types (mL/day) according to drinking locations among adolescents (10-17 years), by country

| **Country** | Occasions | Water | | Milk & derivatives | | Hot beverages | | SSB | | 100% FJ | | A/NSB | | Alcoholic beverages | | Other beverages | | TFI | |
| --- | --- | --- | --- | --- | --- | --- | --- | --- | --- | --- | --- | --- | --- | --- | --- | --- | --- | --- | --- |
| **Mexico (n=376)** | Daily total | 639 | ±35 | 211 | ±12 | 102 | ±10 | 667 | ±29 | 25 | ±4 | 15 | ±3 | 4 | ±2 | 15 | ±4 | 1679 | ±47 |
| Home | 500 | ±29 | 194 | ±11 | 95 | ±10 | 506 | ±26 | 17 | ±3 | 11 | ±2 | 1 | ±0 | 9 | ±3 | 1333 | ±40 |
| School/univ/work | 100 | ±13 | 9 | ±2 | 3 | ±1 | 82 | ±9 | 3 | ±1 | 1 | ±1 | 0 | ±0 | 3 | ±1 | 200 | ±19 |
| Other locations | 39 | ±7 | 8 | ±2 | 5 | ±1 | 79 | ±10 | 6 | ±2 | 3 | ±2 | 3 | ±2 | 3 | ±2 | 146 | ±14 |
| **Brazil (n=194)** | Daily total | 630 | ±41 | 207 | ±17 | 102 | ±11 | 600 | ±32 | 121 | ±17 | 28 | ±5 | 21 | ±7 | 5 | ±2 | 1713 | ±69 |
| Home | 495 | ±30 | 176 | ±15 | 89 | ±10 | 458 | ±26 | 95 | ±16 | 21 | ±4 | 2 | ±1 | 2 | ±1 | 1339 | ±54 |
| School/univ/work | 56 | ±8 | 10 | ±2 | 7 | ±6 | 44 | ±7 | 11 | ±3 | 2 | ±1 | 0 | ±0 | 1 | ±1 | 131 | ±16 |
| Other locations | 73 | ±25 | 20 | ±5 | 5 | ±1 | 93 | ±10 | 13 | ±3 | 5 | ±1 | 18 | ±6 | 1 | ±1 | 229 | ±32 |
|  | Unspecified | 5 | ±2 | 1 | ±1 | 1 | ±1 | 5 | ±2 | 2 | ±1 | 0 | ±0 | 0 | ±0 | 0 | ±0 | 15 | ±3 |
| **Argentina (n=219)** | Daily total | 454 | ±31 | 222 | ±17 | 239 | ±19 | 818 | ±42 | 17 | ±5 | 128 | ±19 | 17 | ±5 | 2 | ±1 | 1897 | ±51 |
| Home | 356 | ±29 | 208 | ±17 | 211 | ±16 | 654 | ±38 | 14 | ±4 | 116 | ±18 | 5 | ±2 | 2 | ±1 | 1566 | ±47 |
| School/univ/work | 80 | ±10 | 10 | ±3 | 18 | ±5 | 96 | ±12 | 1 | ±0 | 8 | ±2 | 2 | ±2 | 0 | ±0 | 214 | ±18 |
| Other locations | 17 | ±5 | 4 | ±1 | 10 | ±3 | 68 | ±8 | 2 | ±1 | 4 | ±2 | 10 | ±4 | 0 | ±0 | 116 | ±12 |
| **Uruguay (n=144)** | Daily total | 561 | ±51 | 318 | ±26 | 164 | ±31 | 521 | ±41 | 21 | ±9 | 57 | ±14 | 2 | ±1 | 25 | ±6 | 1668 | ±68 |
| Home | 469 | ±44 | 278 | ±25 | 145 | ±29 | 401 | ±34 | 18 | ±8 | 47 | ±13 | 2 | ±1 | 18 | ±5 | 1379 | ±59 |
| School/univ/work | 60 | ±14 | 28 | ±7 | 10 | ±8 | 84 | ±17 | 3 | ±3 | 2 | ±2 | 0 | ±0 | 5 | ±2 | 192 | ±24 |
| Other locations | 31 | ±27 | 12 | ±5 | 9 | ±8 | 36 | ±13 | 0 | ±0 | 7 | ±4 | 0 | ±0 | 2 | ±1 | 97 | ±41 |
| **China (n=370)** | Daily total | 632 | ±27 | 189 | ±8 | 37 | ±6 | 253 | ±13 | 45 | ±4 | 7 | ±1 | 13 | ±4 | 1 | ±1 | 1177 | ±31 |
|  | Home | 270 | ±16 | 126 | ±7 | 9 | ±3 | 46 | ±4 | 14 | ±2 | 1 | ±0 | 2 | ±1 | 1 | ±0 | 468 | ±19 |
|  | School/univ/work | 303 | ±16 | 37 | ±3 | 15 | ±3 | 111 | ±7 | 15 | ±2 | 4 | ±1 | 1 | ±0 | 1 | ±1 | 487 | ±19 |
|  | Other locations | 59 | ±5 | 26 | ±3 | 13 | ±2 | 96 | ±7 | 16 | ±2 | 2 | ±0 | 10 | ±3 | 0 | ±0 | 222 | ±14 |
| **Indonesia (n=478)** | Daily total | 1933 | ±43 | 136 | ±11 | 121 | ±9 | 282 | ±16 | 9 | ±2 | 3 | ±2 | 0 | ±0 | 4 | ±1 | 2488 | ±49 |
|  | Home | 1700 | ±40 | 119 | ±10 | 110 | ±8 | 172 | ±12 | 6 | ±2 | 1 | ±0 | 0 | ±0 | 3 | ±1 | 2110 | ±45 |
|  | School/univ/work | 210 | ±16 | 10 | ±2 | 10 | ±2 | 80 | ±7 | 2 | ±1 | 1 | ±1 | 0 | ±0 | 1 | ±0 | 313 | ±20 |
|  | Other locations | 23 | ±6 | 7 | ±2 | 1 | ±1 | 31 | ±4 | 1 | ±0 | 1 | ±1 | 0 | ±0 | 0 | ±0 | 65 | ±9 |

*SEM* Standard error of the mean, *SSB* sugar sweetened beverages, *FJ* fruit juices, *A/NSB* artificial/non-nutritive sweeteners beverages, *TFI* total fluid intake

**Table S5c** Mean (SEM) intake of different fluid types (mL/day) according to drinking locations among adults (≥18 years), by country

| Country | Occasions | Water | | Milk & derivatives | | Hot beverages | | SSB | | 100% FJ | | A/NSB | | Alcoholic beverages | | | Other beverages | | | TFI | | |
| --- | --- | --- | --- | --- | --- | --- | --- | --- | --- | --- | --- | --- | --- | --- | --- | --- | --- | --- | --- | --- | --- | --- |
| Mexico (n=1677) | Daily total | 673 | ±18 | 132 | ±5 | 210 | ±7 | 655 | ±13 | 35 | ±3 | 23 | ±2 | 22 | ±2 | 6 | | ±1 | 1754 | | ±24 |
| Home | 554 | ±16 | 119 | ±4 | 193 | ±6 | 504 | ±11 | 27 | ±2 | 15 | ±2 | 10 | ±1 | 4 | | ±1 | 1426 | | ±21 |
| School/univ/work | 78 | ±7 | 4 | ±1 | 10 | ±1 | 83 | ±5 | 3 | ±1 | 5 | ±1 | 1 | ±1 | 0 | | ±0 | 184 | | ±10 |
| Other locations | 41 | ±4 | 8 | ±1 | 7 | ±1 | 68 | ±4 | 6 | ±1 | 3 | ±1 | 11 | ±2 | 1 | | ±0 | 145 | | ±7 |
| Brazil (n=477) | Daily total | 756 | ±28 | 92 | ±7 | 199 | ±10 | 490 | ±19 | 110 | ±7 | 23 | ±4 | 142 | ±12 | 10 | | ±2 | 1822 | | ±46 |
| Home | 614 | ±24 | 77 | ±6 | 165 | ±9 | 359 | ±16 | 78 | ±6 | 14 | ±2 | 63 | ±7 | 5 | | ±1 | 1376 | | ±38 |
| School/univ/work | 85 | ±8 | 6 | ±2 | 20 | ±3 | 56 | ±7 | 13 | ±2 | 5 | ±1 | 3 | ±2 | 3 | | ±2 | 191 | | ±18 |
| Other locations | 53 | ±6 | 8 | ±1 | 13 | ±2 | 72 | ±6 | 17 | ±2 | 3 | ±1 | 73 | ±8 | 2 | | ±1 | 242 | | ±15 |
|  | Unspecified | 4 | ±1 | 0 | ±0 | 1 | ±0 | 3 | ±1 | 0 | ±0 | 0 | ±0 | 3 | ±1 | 0 | | ±0 | 12 | | ±2 |
| Argentina (n=1089) | Daily total | 581 | ±20 | 60 | ±4 | 827 | ±17 | 488 | ±16 | 22 | ±3 | 160 | ±10 | 128 | ±8 | 6 | | ±1 | 2272 | | ±31 |
| Home | 436 | ±16 | 49 | ±4 | 629 | ±15 | 353 | ±13 | 17 | ±2 | 128 | ±9 | 73 | ±6 | 5 | | ±1 | 1691 | | ±26 |
| School/univ/work | 116 | ±9 | 5 | ±1 | 155 | ±9 | 83 | ±6 | 3 | ±1 | 18 | ±3 | 1 | ±0 | 0 | | ±0 | 382 | | ±17 |
| Other locations | 29 | ±4 | 6 | ±1 | 42 | ±3 | 52 | ±4 | 2 | ±0 | 14 | ±3 | 53 | ±5 | 1 | | ±1 | 199 | | ±10 |
| Uruguay (n=554) | Daily total | 493 | ±22 | 83 | ±6 | 873 | ±35 | 359 | ±17 | 26 | ±4 | 103 | ±10 | 48 | ±6 | 14 | | ±3 | 1999 | | ±43 |
| Home | 393 | ±18 | 73 | ±6 | 677 | ±30 | 269 | ±14 | 21 | ±3 | 77 | ±8 | 37 | ±5 | 10 | | ±2 | 1557 | | ±37 |
| School/univ/work | 80 | ±9 | 7 | ±2 | 151 | ±17 | 67 | ±9 | 5 | ±2 | 13 | ±3 | 0 | ±0 | 4 | | ±2 | 327 | | ±23 |
| Other locations | 20 | ±5 | 3 | ±1 | 44 | ±8 | 23 | ±5 | 1 | ±0 | 13 | ±3 | 11 | ±2 | 0 | | ±0 | 114 | | ±11 |
| China (n=1584) | Daily total | 751 | ±16 | 132 | ±3 | 136 | ±7 | 261 | ±7 | 35 | ±2 | 7 | ±1 | 62 | ±4 | 2 | | ±0 | 1387 | | ±18 |
| Home | 394 | ±11 | 81 | ±3 | 32 | ±2 | 45 | ±2 | 11 | ±1 | 2 | ±1 | 22 | ±2 | 0 | | ±0 | 588 | | ±13 |
| School/univ/work | 249 | ±9 | 25 | ±1 | 77 | ±5 | 99 | ±4 | 10 | ±1 | 2 | ±0 | 3 | ±1 | 0 | | ±0 | 466 | | ±11 |
| Other locations | 108 | ±4 | 26 | ±1 | 27 | ±2 | 116 | ±4 | 14 | ±1 | 3 | ±0 | 37 | ±2 | 1 | | ±0 | 333 | | ±8 |
| **Indonesia (n=2778)** | Daily total | 2164 | ±20 | 52 | ±3 | 263 | ±6 | 227 | ±7 | 12 | ±1 | 2 | ±0 | 0 | ±0 | 2 | | ±0 | 2721 | | ±22 |
|  | Home | 1943 | ±20 | 46 | ±2 | 224 | ±5 | 138 | ±5 | 7 | ±1 | 1 | ±0 | 0 | ±0 | 1 | | ±0 | 2361 | | ±21 |
|  | School/univ/work | 185 | ±7 | 3 | ±0 | 32 | ±2 | 57 | ±3 | 2 | ±0 | 1 | ±0 | 0 | ±0 | 0 | | ±0 | 279 | | ±9 |
|  | Other locations | 35 | ±3 | 3 | ±0 | 8 | ±1 | 32 | ±2 | 2 | ±0 | 0 | ±0 | 0 | ±0 | 0 | | ±0 | 81 | | ±5 |

*SEM* Standard error of the mean, *SSB* sugar sweetened beverages, *FJ* fruit juices, *A/NSB* artificial/non-nutritive sweeteners beverages, *TFI* total fluid intake

**Fig S1a** Contribution of the different fluid types to total fluid intake according to drinking occasion of children (4-9y), by country

**Fig S1b** Contribution of the different fluid types to total fluid intake according to drinking occasion of adolescents (10-17 y), by country

**Fig S1c** Contribution of the different fluid types to total fluid intake according to drinking occasion of adults (≥18 y), by country

**Fig S2** Contribution of the fluid intake for each location to the total fluid intake (%), by country and age group

**Fig S3a** Contribution of the different fluid types to total fluid intake according to drinking occasion of children (4-9 years), by country

**Fig S3b** Contribution of the different fluid types to total fluid intake according to drinking occasion of children (10-17 years), by country

**Fig S3c** Contribution of the different fluid types to total fluid intake according to drinking occasion of adults (≥18 years), by country
